# Supplementary material for: Decreased Plasma Levels of Kynurenine and Kynurenic Acid in Previously Treated and First-Episode Antipsychotic-Naive Schizophrenia Patients
Source: MDPI journal article supplement (doi:10.3390/cells12242814), 2023-12-11

## Supplementary Materials:

**Figure S1:** Chromatogram of kynurenine (KYN), kynurenic acid (KYNA) and tryptophan (TRP) in human plasma

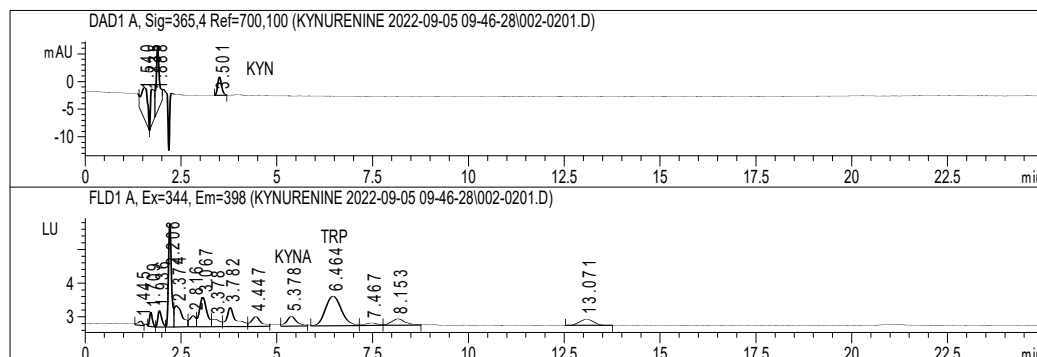

**Figure S2:** Chromatogram of kynurenine (KYN), kynurenic acid (KYNA) and tryptophan (TRP) standards

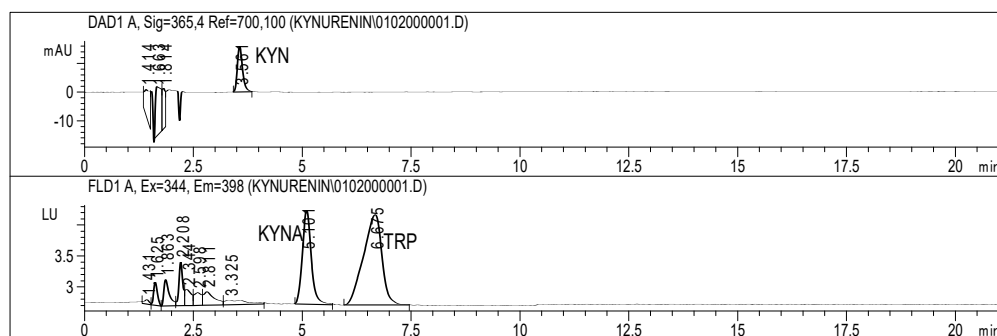

**Table S1:** Linearity curve, correlation coefficient, residual standard deviation (RSD) and retention time (RT) for HPLC determination of KYN, KYNA and TRP

| Compound | Concentration range       | Linearity curve* | Correlation coefficient | RSD     | RT  |
|----------|---------------------------|------------------|-------------------------|---------|-----|
| KYN      | 0.5 -10 $\mu\text{mol/L}$ | $y = 25.23x$     | 0.99998                 | 0.99436 | 3.5 |
| KYNA     | 5 -100 $\text{nmol/L}$    | $y = 498.03x$    | 0.99985                 | 0.52174 | 5.3 |
| TRP      | 5 -100 $\mu\text{mol/L}$  | $y = 1.25x$      | 0.99907                 | 3.27371 | 6.5 |

\*Linearity curve is given according to the equation  $y = mx$ . Linearity was determined by seven-point calibration.

**Figure S3:** Calibration curve for kynurenine (KYN) determination

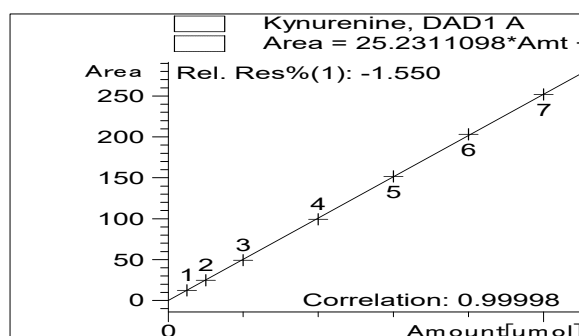

**Figure S4:** Calibration curve for kynurenic acid (KYNA) determination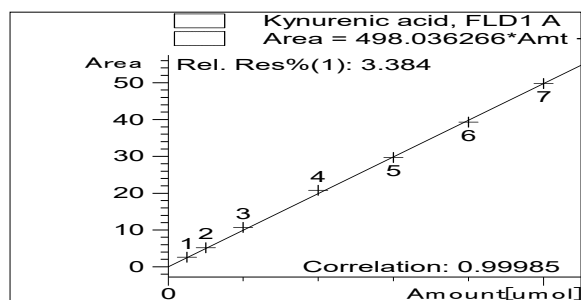**Figure S5:** Calibration curve for tryptophan (TRP) determination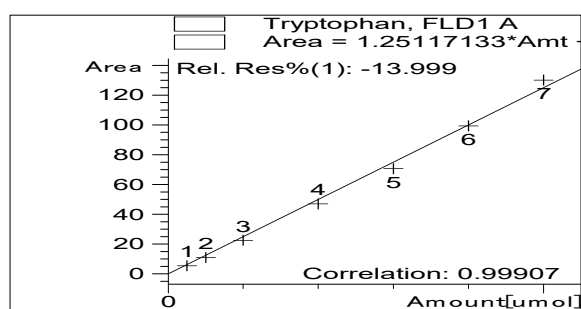

Supplement: s1 [file s1]
